# Supplementary material for: Defective apoptotic cell contractility provokes sterile inflammation, leading to liver damage and tumour suppression
Source: eLife journal article supplement (doi:10.7554/elife.61983), 2021-04-19
Supplement: supp [file elife-61983-supp-v1.zip]

Archive with 11 entries (11 files):
- elife_poa_e61983_Figure_1_figure_supplement_1.pdf
- elife_poa_e61983_Figure_1_figure_supplement_2.pdf
- elife_poa_e61983_Figure_1_figure_supplement_3.pdf
- elife_poa_e61983_Figure_2_figure_supplement_1.pdf
- elife_poa_e61983_Figure_3_figure_supplement_1.pdf
- elife_poa_e61983_Figure_3_figure_supplement_2.pdf
- elife_poa_e61983_Figure_7_figure_supplement_1.pdf
- elife_poa_e61983_Figure_8_figure_supplement_1.pdf
- elife_poa_e61983_Video_1.avi
- elife_poa_e61983_Video_2.avi
- elife_poa_e61983_Transparent_Reporting_File.docx
