# Supplementary material for: Defective apoptotic cell contractility provokes sterile inflammation, leading to liver damage and tumour suppression
Source: eLife journal article supplement (doi:10.7554/elife.61983), 2021-04-19
Supplement: supp [file elife-61983-supp-v1.zip › elife_poa_e61983_Figure_1_figure_supplement_2.pdf]

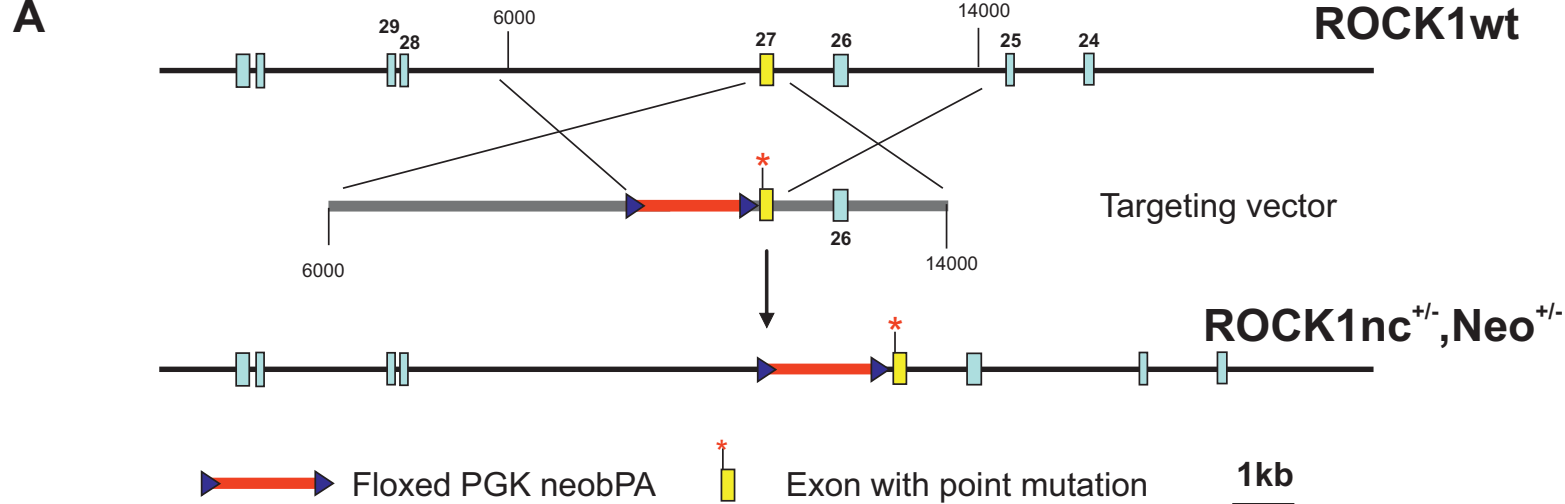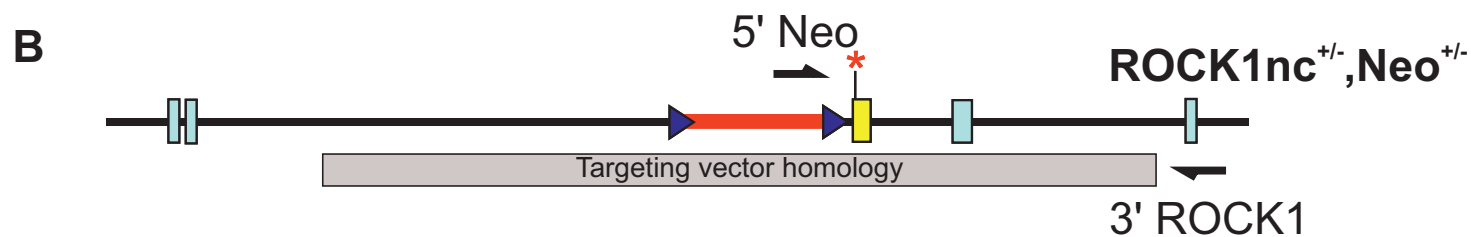

Predicted Screening Products

| Screening Primers | ROCK1 wt (kb) | ROCK1 nc (kb) |
|-------------------|---------------|---------------|
| 5' Neo / 3' ROCK1 | -             | 3.5           |

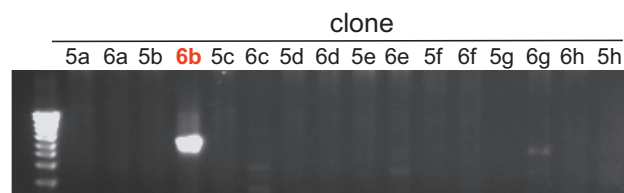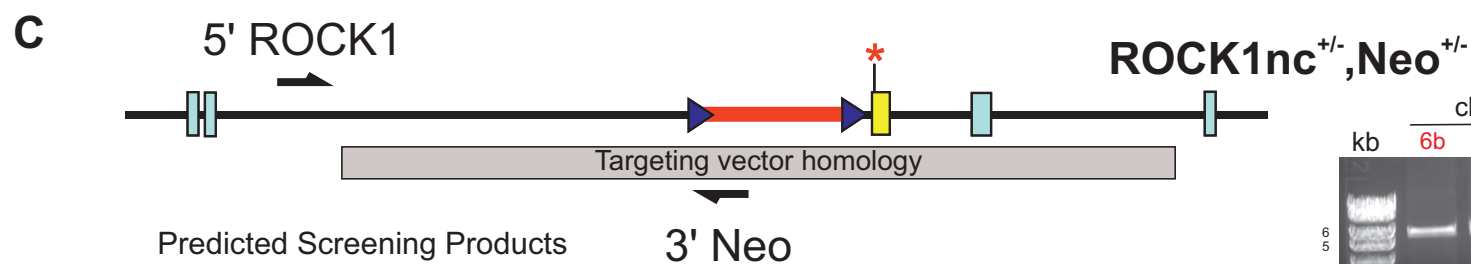

Predicted Screening Products

| Screening Primers | ROCK1 wt (kb) | ROCK1 nc (kb) |
|-------------------|---------------|---------------|
| 5' ROCK1 / 3' Neo | -             | 5.5           |

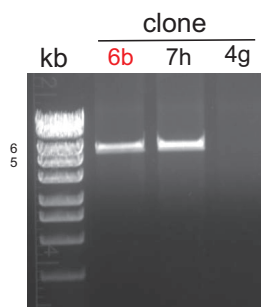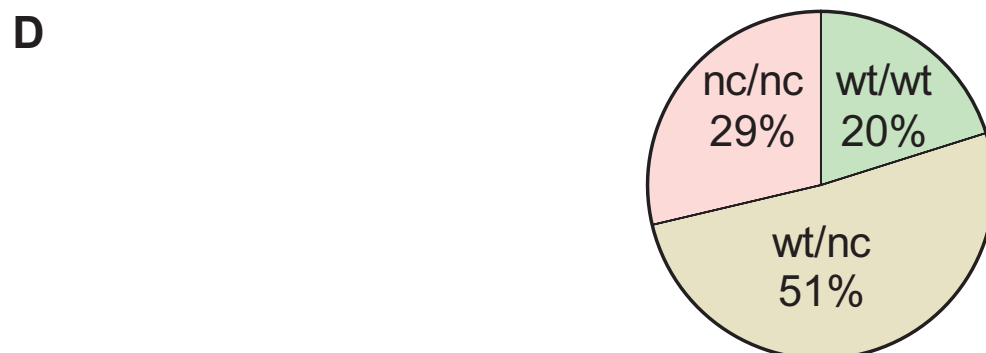

Figure 1-supplement 2
