# Supplementary figures and images for: Defective apoptotic cell contractility provokes sterile inflammation, leading to liver damage and tumour suppression
Source: eLife journal article supplement (doi:10.7554/elife.61983), 2021-04-19

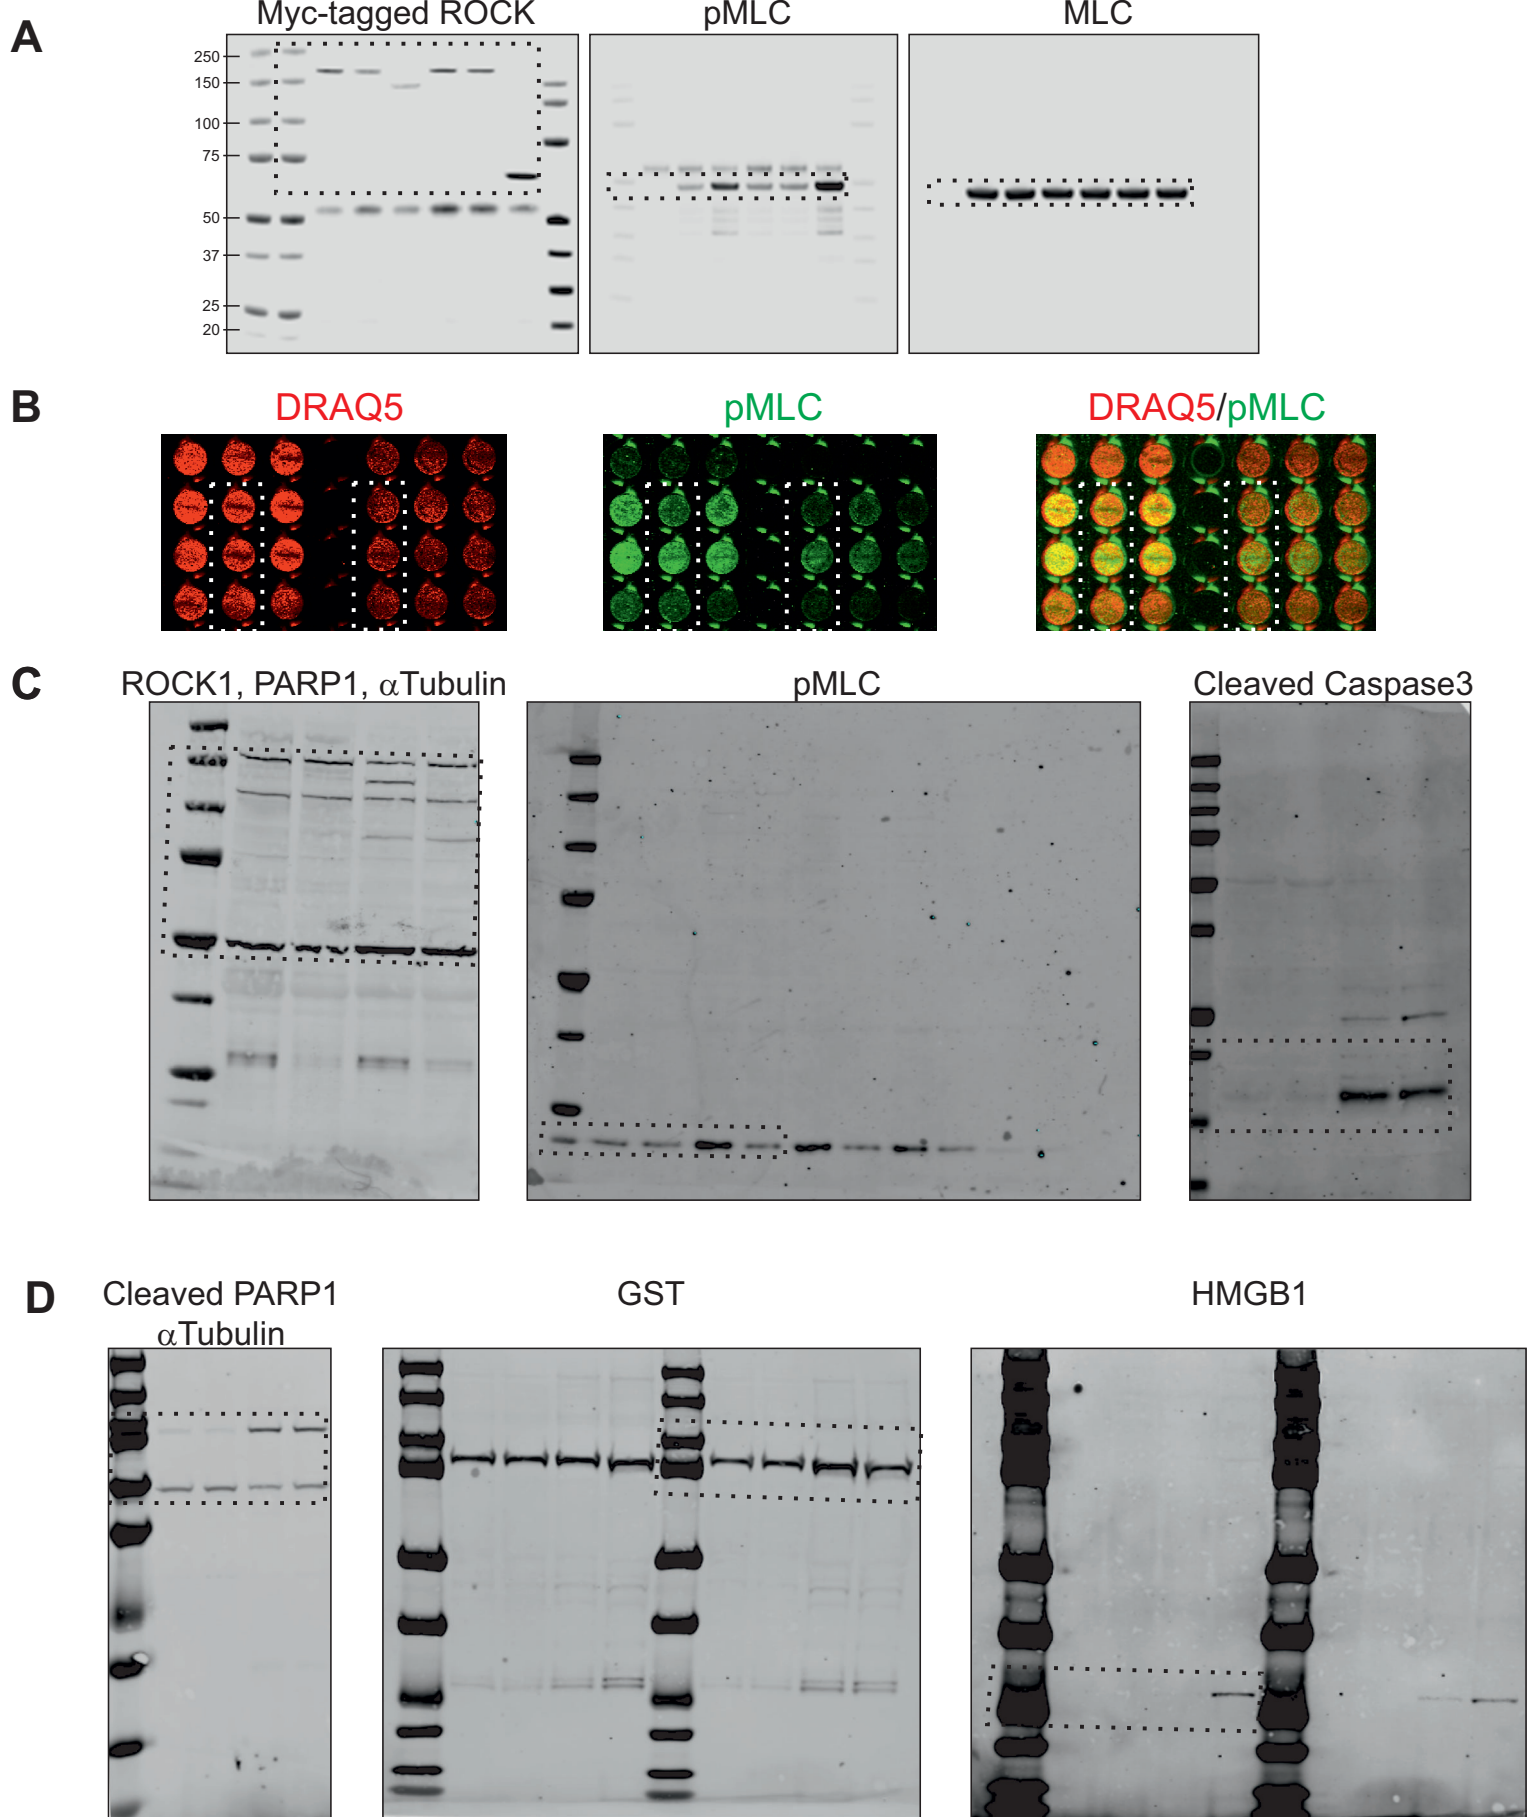

Figure 1-supplement 1

Supplement: supp [file elife-61983-supp-v1.zip › elife_poa_e61983_Figure_1_figure_supplement_1.pdf]

**ROCK1wt****ROCK1nc**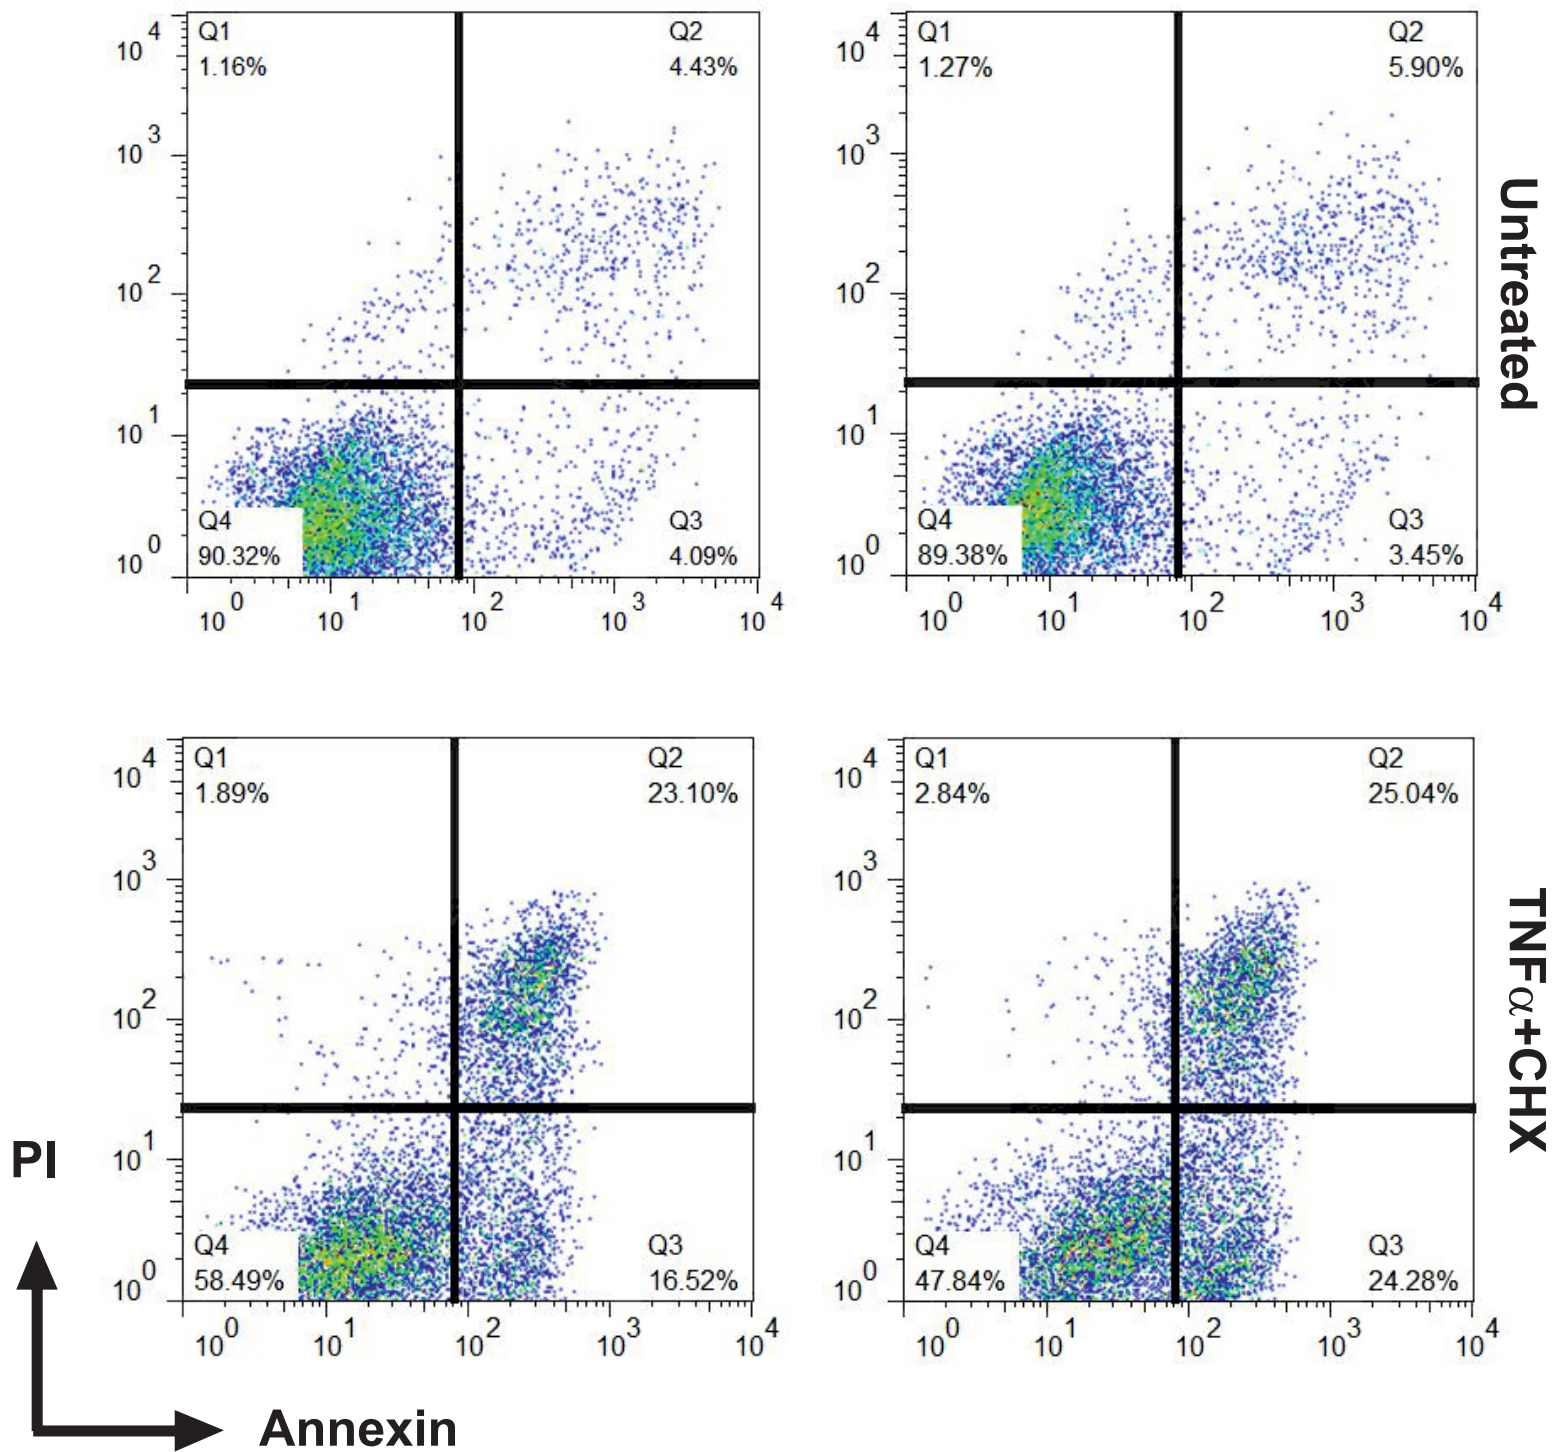**Figure 1-supplement 3**

Supplement: supp [file elife-61983-supp-v1.zip › elife_poa_e61983_Figure_1_figure_supplement_3.pdf]

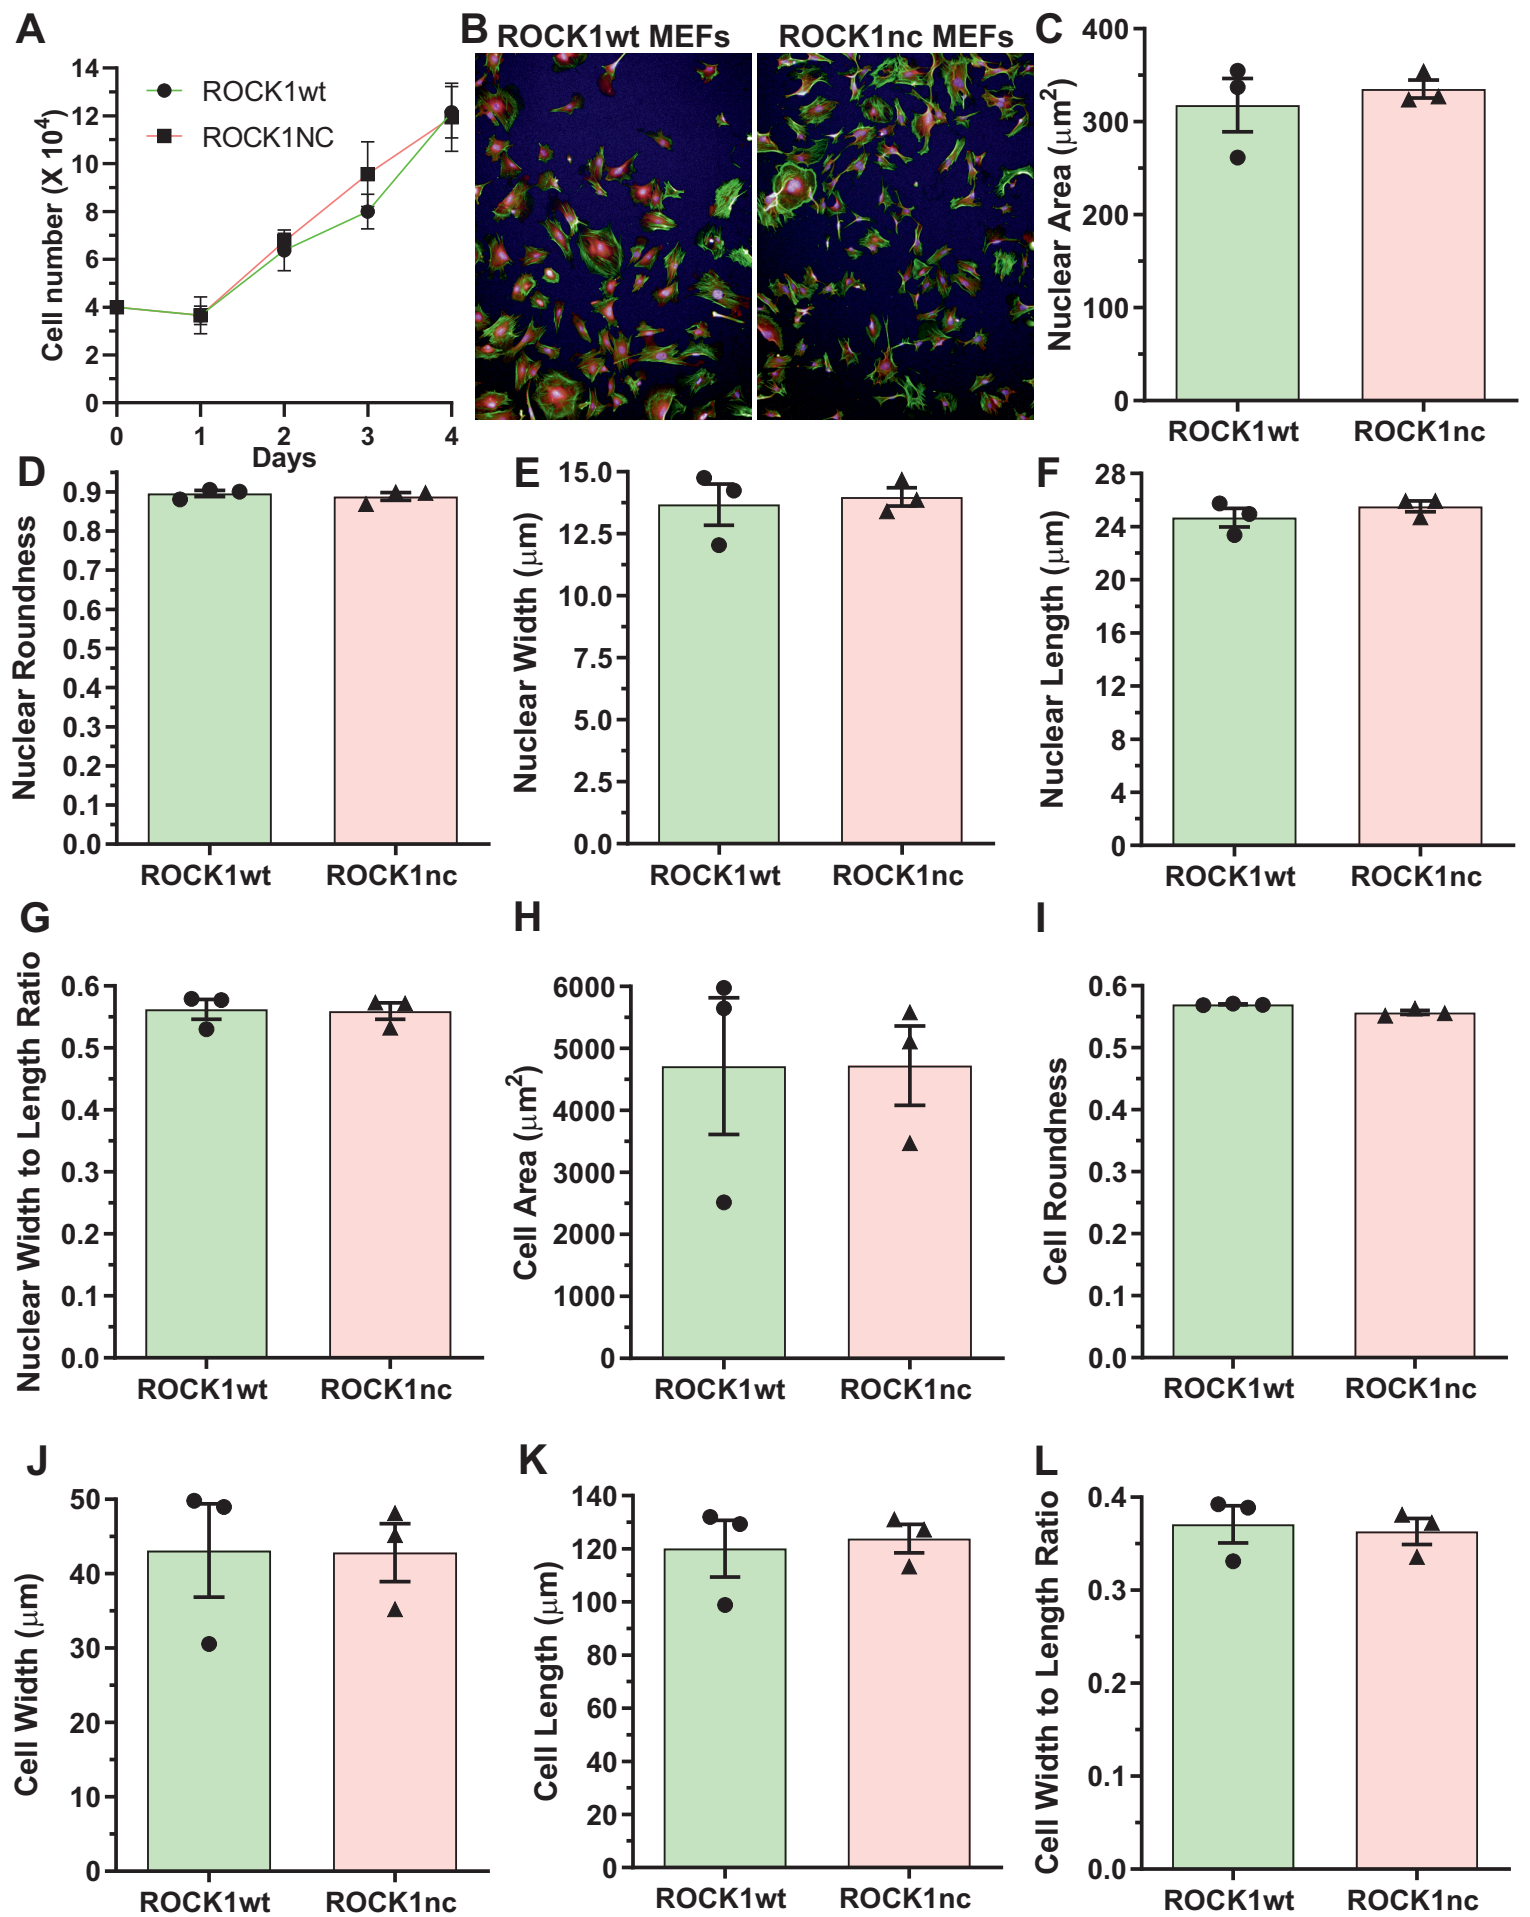

Figure 2-supplement 1

Supplement: supp [file elife-61983-supp-v1.zip › elife_poa_e61983_Figure_2_figure_supplement_1.pdf]

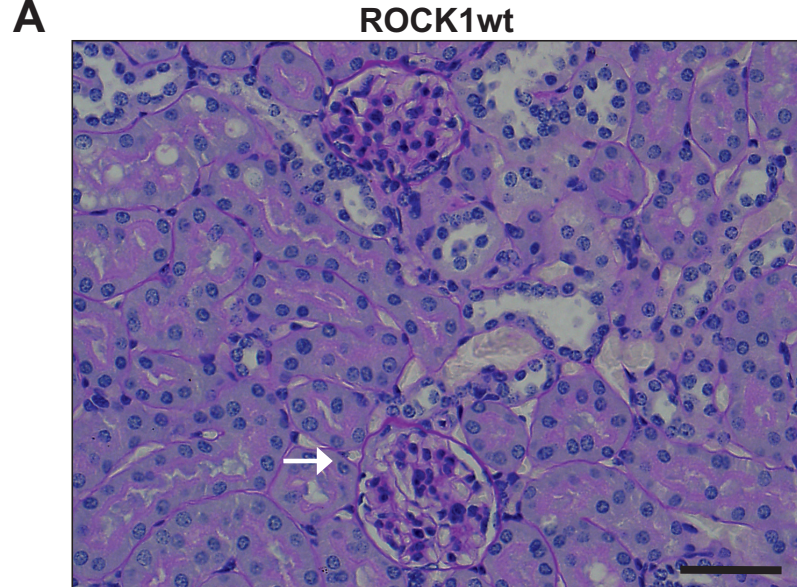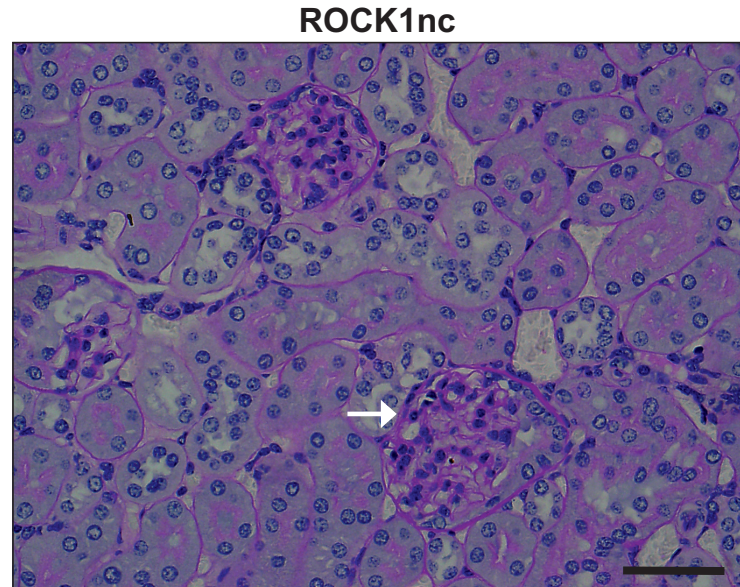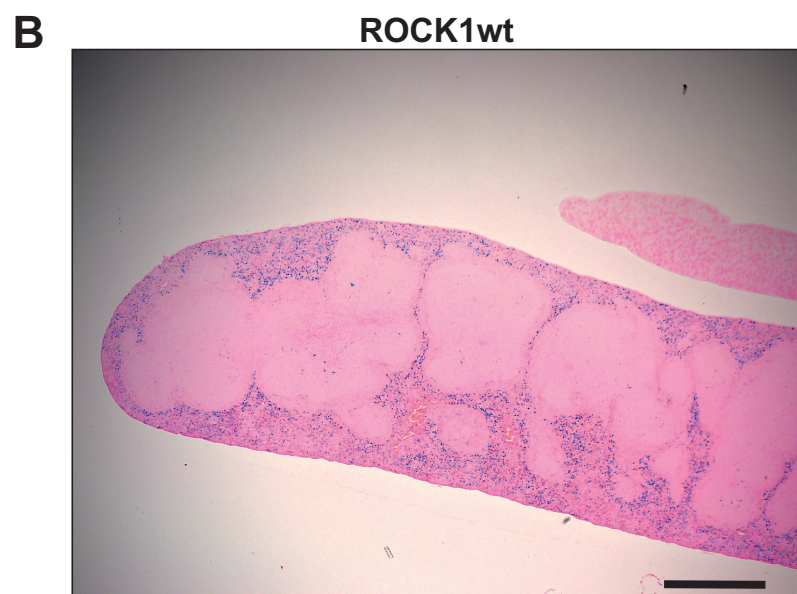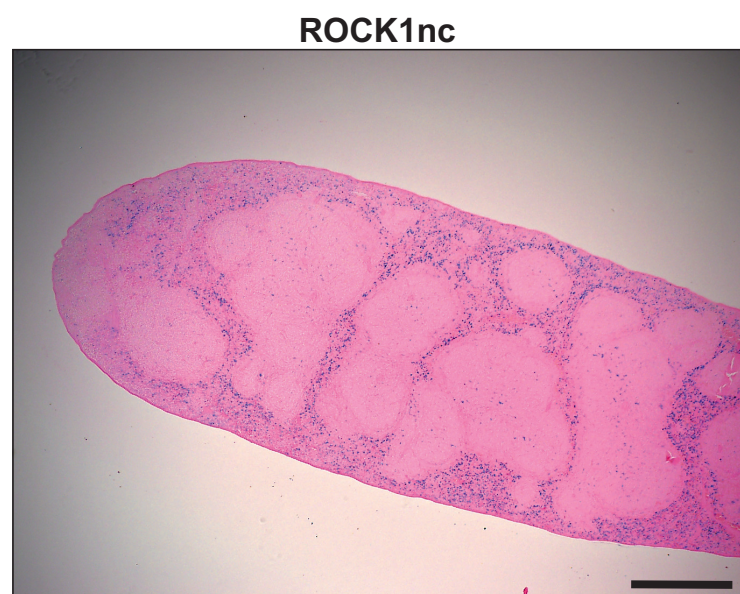

Figure 3-supplement 1

Supplement: supp [file elife-61983-supp-v1.zip › elife_poa_e61983_Figure_3_figure_supplement_1.pdf]

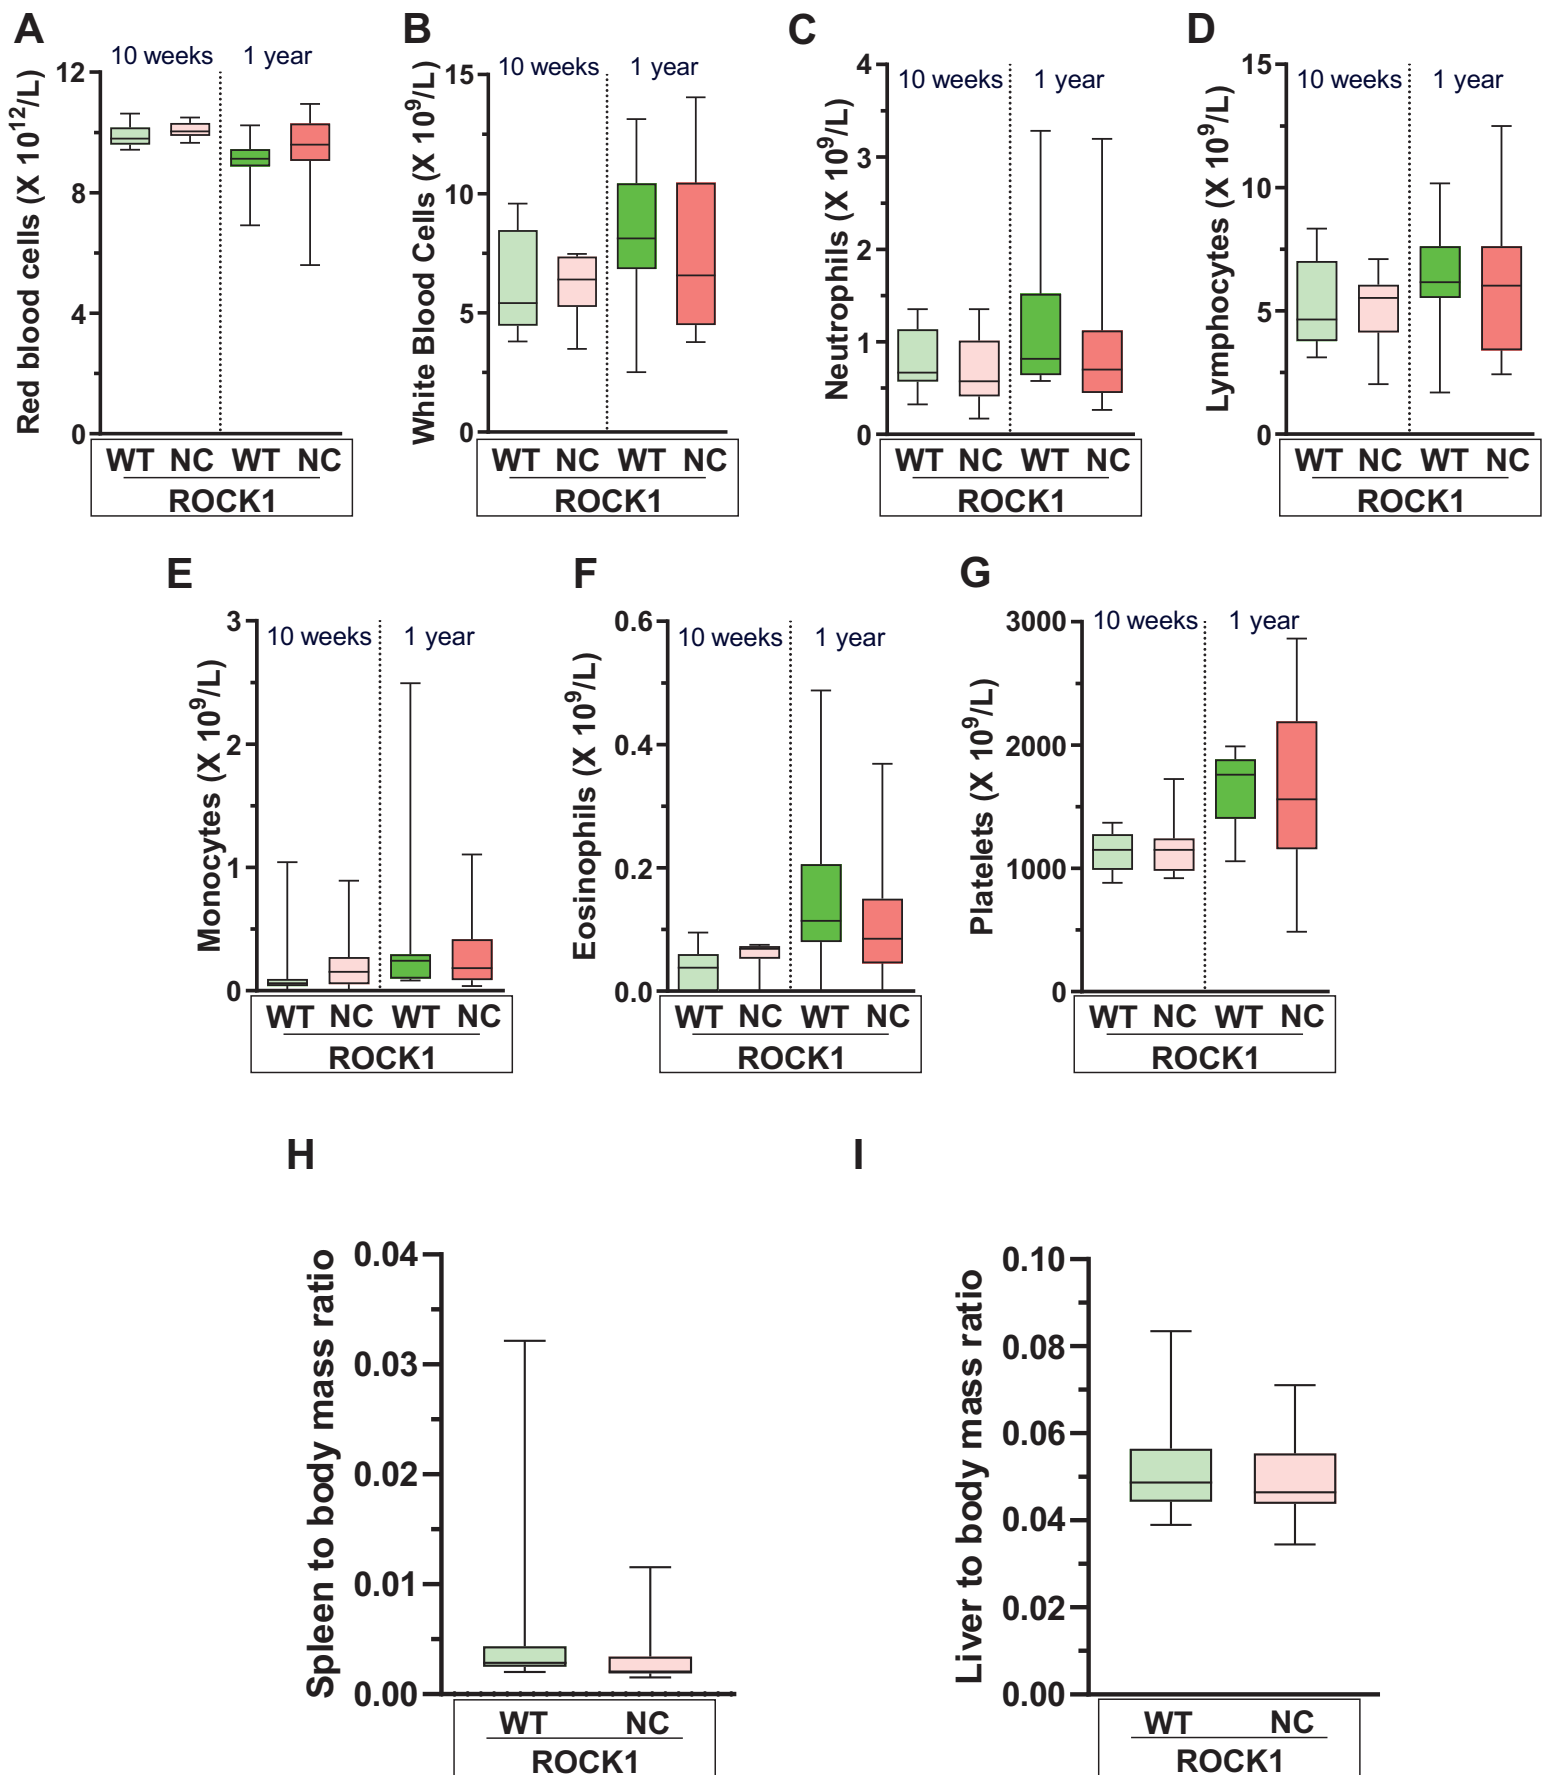

Figure 3-supplement 2

Supplement: supp [file elife-61983-supp-v1.zip › elife_poa_e61983_Figure_3_figure_supplement_2.pdf]

**A**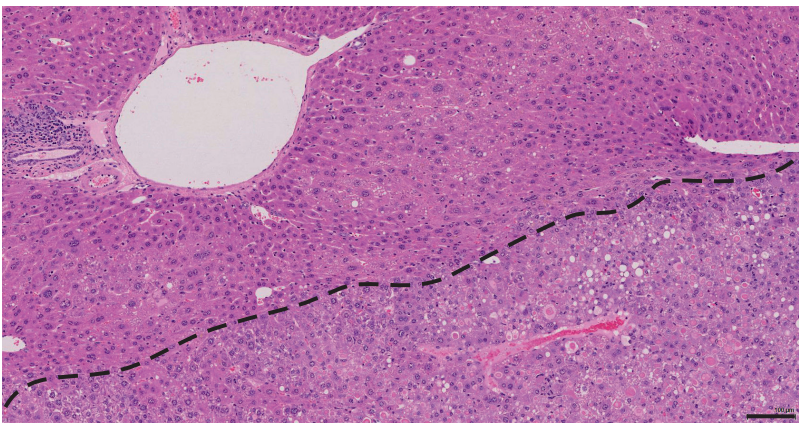**B**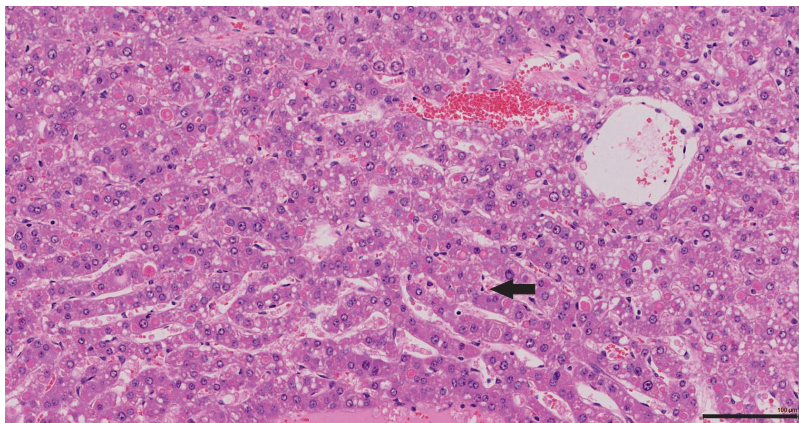**C**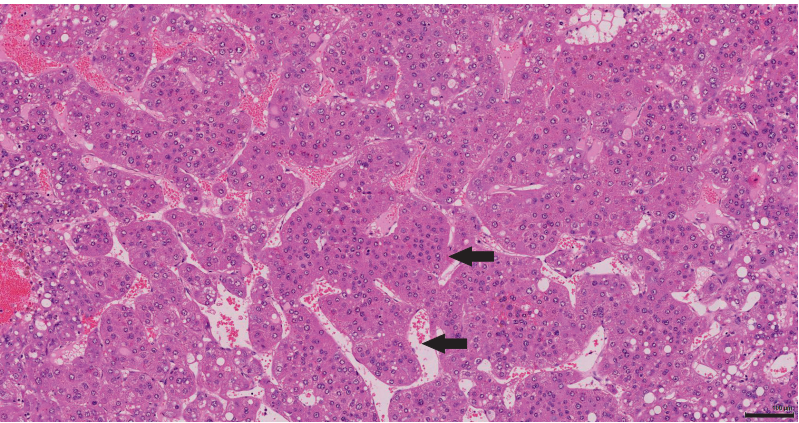**D**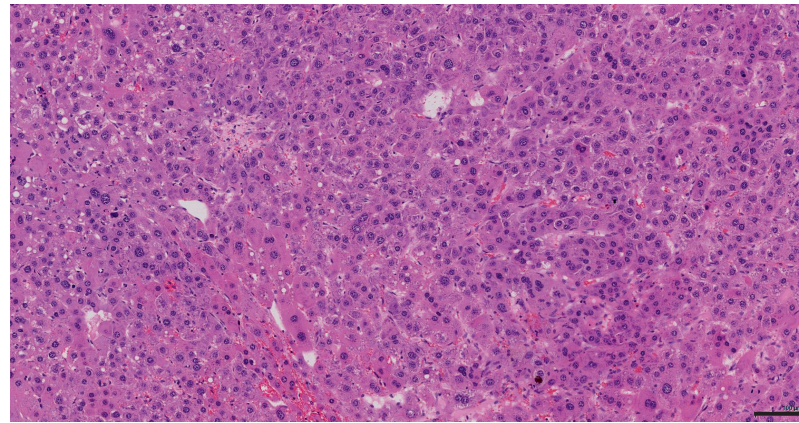**E**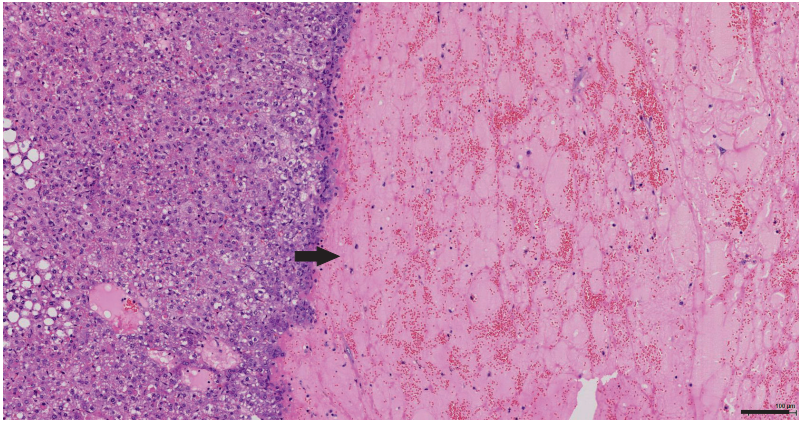**F**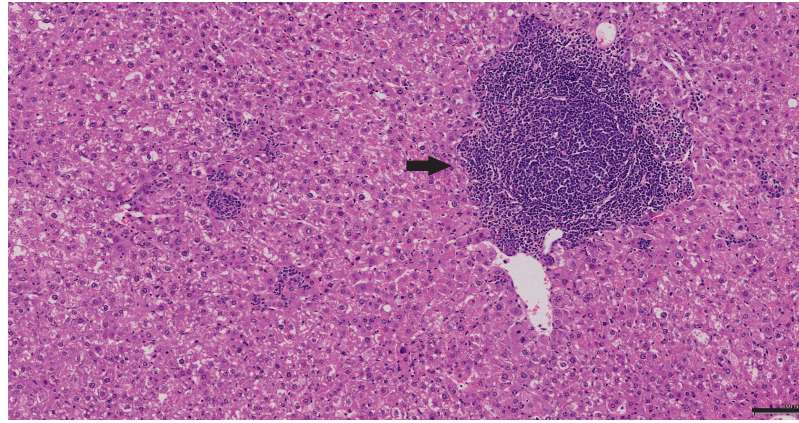

Supplement: supp [file elife-61983-supp-v1.zip › elife_poa_e61983_Figure_7_figure_supplement_1.pdf]

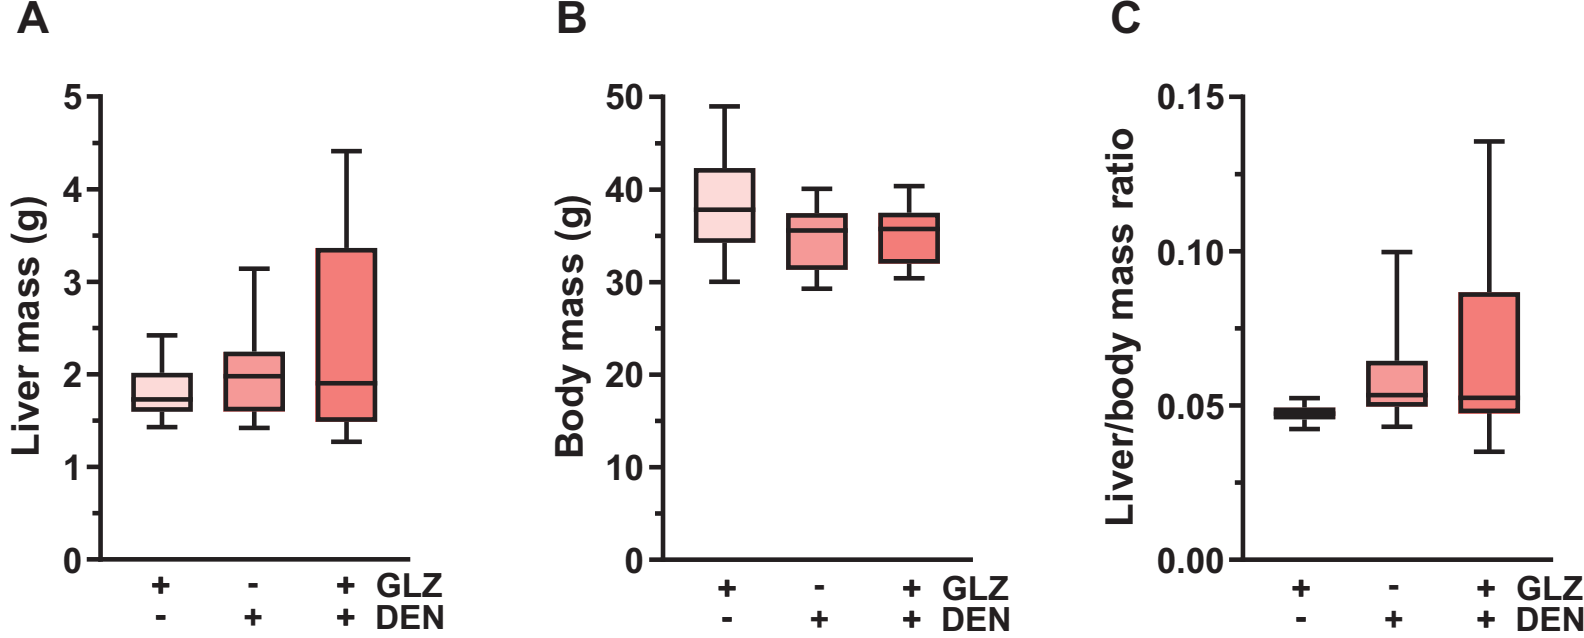

Figure 8-supplement 1

Supplement: supp [file elife-61983-supp-v1.zip › elife_poa_e61983_Figure_8_figure_supplement_1.pdf]
